# Supplementary material for: Z-scheme BiVO4/Ag/Ag2S composites with enhanced photocatalytic efficiency under visible light
Source: RSC Adv. 2020 Aug 18;10(51):30245–53. doi: 10.1039/d0ra05712f (PMC9056282; doi:10.1039/d0ra05712f)
Supplement: RA-010-D0RA05712F-s001 [file RA-010-D0RA05712F-s001.pdf]

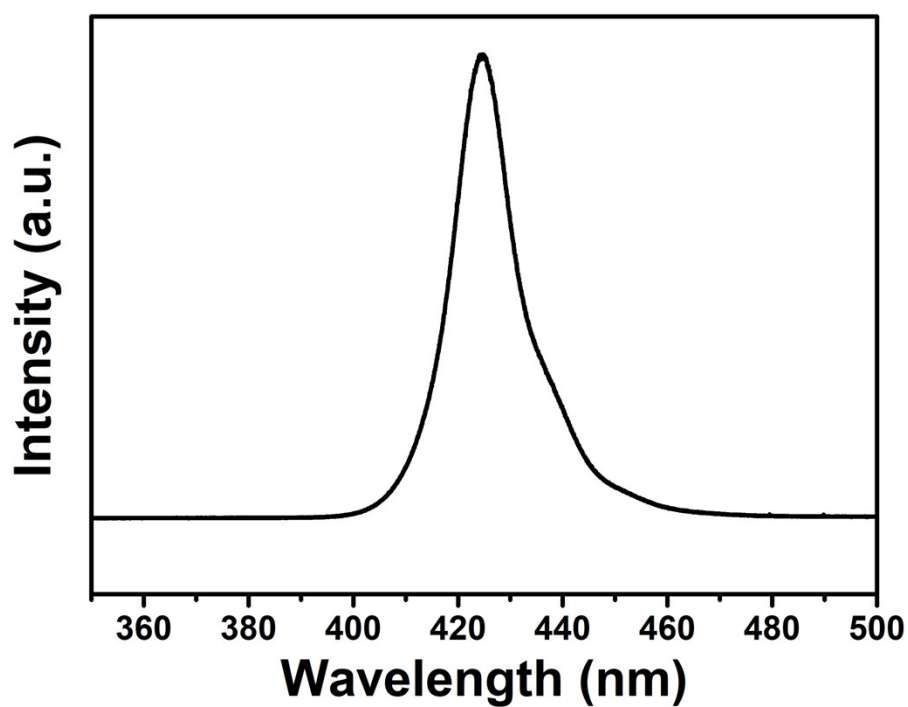

Fig. S1. The light spectrum of LED lamp (30 W).

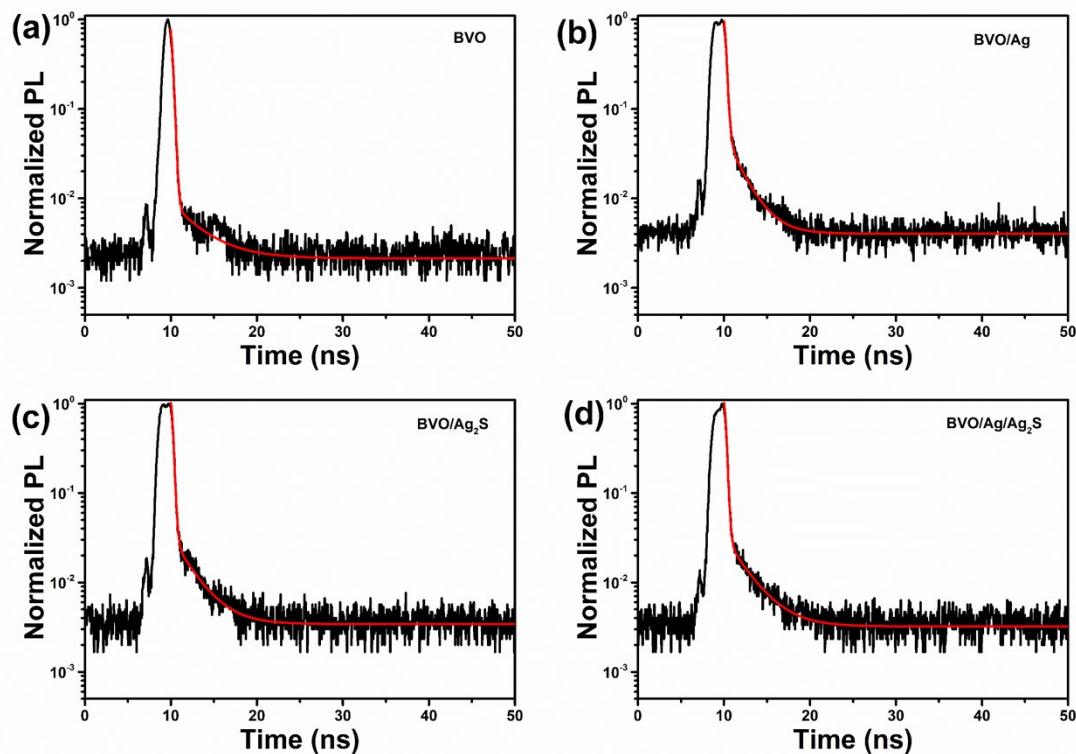

Fig. S2. Time-resolved PL decay spectra of (a)  $\text{BiVO}_4$ , (b)  $\text{BiVO}_4/\text{Ag}$ , (c)  $\text{BiVO}_4/\text{Ag}_2\text{S}$ , and (d)  $\text{BiVO}_4/\text{Ag}/\text{Ag}_2\text{S}$ .

The recorded PL decay curves (Fig. S2) were fitted by a biexponential function. The fast decay component ( $\tau_1$ ) and slow component ( $\tau_2$ ) were calculated and listed in Table S1.  $\tau_1$  is usually arises from the nonradiative relaxation process, and  $\tau_2$  is usually attributed to the radiative process from the photoinduced carrier's recombination. The  $\text{BiVO}_4/\text{Ag}/\text{Ag}_2\text{S}$  sample shows the highest  $\tau_2$ , suggesting a lowest recombination of photogenerated electron-hole pairs.

Table S1. Fitted parameters from time-resolved PL spectroscopy of BiVO<sub>4</sub>, BiVO<sub>4</sub>/Ag, BiVO<sub>4</sub>/Ag<sub>2</sub>S, and BiVO<sub>4</sub>/Ag/Ag<sub>2</sub>S samples.

|               | BiVO <sub>4</sub> | BiVO <sub>4</sub> /Ag | BiVO <sub>4</sub> /Ag <sub>2</sub> S | BiVO <sub>4</sub> /Ag/Ag <sub>2</sub> S |
|---------------|-------------------|-----------------------|--------------------------------------|-----------------------------------------|
| $\tau_1$ (ns) | 0.16              | 0.19                  | 0.16                                 | 0.17                                    |
| $\tau_2$ (ns) | 1.92              | 1.94                  | 2.37                                 | 2.6                                     |

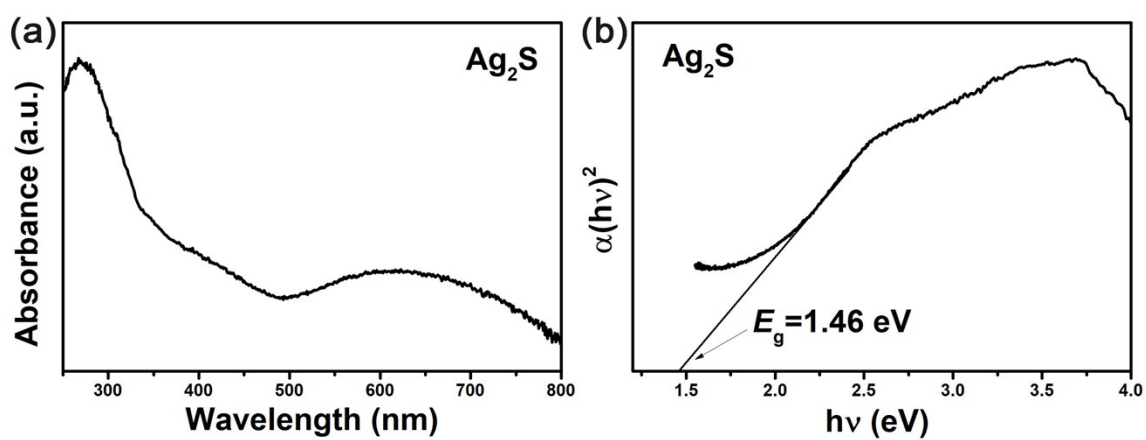

**Fig. S3.** (a) UV-vis DRS absorption and (b) the plot of  $(\alpha h\nu)^2$  vs.  $h\nu$  of the as-obtained  $\text{Ag}_2\text{S}$  sample.
